# Supplementary material
Source: Springer Nature journal article supplement (https://www.springermedizin.de/resource/supplementary/12878_2012_6_MOESM1_ESM.pdf/9686336)
Supplement: MOESM1 [file 9686336]

| Cell type       | Subset                            | Lymphocyte phenotype                | Percentage of parent population<br>(total numbers x 10 <sup>6</sup> /L) |            |           |
|-----------------|-----------------------------------|-------------------------------------|-------------------------------------------------------------------------|------------|-----------|
|                 |                                   |                                     | January 2011                                                            | June 2011  | Reference |
| <b>T cells</b>  | All                               | CD3+CD4+CD8-                        | 55                                                                      | 54         | [43;54]   |
|                 | Naïve (1)                         | CD4+CD45RA+CD45RO-                  | 22                                                                      | ND         | [22;67]   |
|                 | Naïve (2)                         | CD3+CD4+CD8-CCR7+CD27+CD45RA+       | 28                                                                      | 21         | NA        |
|                 | Memory (1)                        | CD4+CD45RA-CD45RO+                  | 76                                                                      | ND         | [35;82]   |
|                 | Central memory                    | CD3+CD4+CD8-CCR7+CD27+CD45RA-       | 59                                                                      | 65         | NA        |
|                 | Effector memory                   | CD3+CD4+CD8-CCR7-CD27+CD45RA-       | 9.2                                                                     | 9.0        | NA        |
|                 | Effector memory                   | CD3+CD4+CD8-CCR7-CD27-CD45RA(-/+)   | 2.9                                                                     | 3.3        | NA        |
|                 |                                   |                                     |                                                                         |            |           |
|                 | All                               | CD3+CD4-CD8+                        | 30                                                                      | 32         | [28;37]   |
|                 | Naïve (1)                         | CD8+CD45RA+CD45RO-                  | 57                                                                      | ND         | [31;78]   |
|                 | Naïve (2)                         | CD3+CD4-CD8+CCR7+CD27+CD45RA+       | 31                                                                      | 32         | NA        |
|                 | Memory (1)                        | CD8+CD45RA-CD45RO+                  | 36                                                                      | ND         | [24;69]   |
|                 | Central memory                    | CD3+CD4-CD8+CCR7+CD27+CD45RA-       | 4.1                                                                     | 5.8        | NA        |
|                 | Effector memory                   | CD3+CD4-CD8+CCR7-CD27+CD45RA(-/+)   | 47                                                                      | 41         | NA        |
| Effector memory | CD3+CD4-CD8+CCR7-CD27-CD45RA(-/+) | 19                                  | 21                                                                      | NA         |           |
|                 |                                   |                                     |                                                                         |            |           |
|                 | Double negative                   | CD3+CD4-CD8-                        | 15                                                                      | 13         | NA        |
|                 |                                   |                                     |                                                                         |            |           |
|                 | Double positive                   | CD3+CD4+CD8+                        | 0.4                                                                     | 0.3        | NA        |
|                 |                                   |                                     |                                                                         |            |           |
| <b>B cells</b>  | Marginal zone-like                | CD19+/CD20+IgM+IgD+CD38-CD27+CD3-   | 3.5 (10.0)                                                              | 5.0 (54.5) | [7.4;33]  |
|                 | Transitional                      | CD19+/CD20+IgM+IgD+CD38+CD27-CD3-   | 20 (57)                                                                 | 12 (130.7) | [0.6;3.4] |
|                 | Naïve                             | CD19+CD20+IgM+IgD+CD38-CD27-CD3-    | 75 (213.8)                                                              | 80 (871.2) | [43;82]   |
|                 | Isotype-switched, memory          | CD19+/CD20+IgM-IgD-CD38-CD27+CD3-   | 0.1 (0.3)                                                               | 0.1 (1.1)  | [6.5;29]  |
|                 | Plasmablast                       | CD19+/CD20-IgM(-/dim)IgD-CD38+CD27+ | 0.0 (0)                                                                 | 0.0 (0)    | [0.4;3.6] |
|                 | CD21low                           | CD19+/CD20+CD38-CD21dim             | 24 (68.4)                                                               | 20 (217.8) | [0.9;7.6] |

**Supplementary Table 1.** T and B cell subsets. Relative concentrations of T and B cell subsets are shown. Total T- and B-cell concentrations were as follows: January 2011: 1300 x 10<sup>6</sup>/L and 285 x 10<sup>6</sup>/L, respectively; and June 2011: 2812 x 10<sup>6</sup>/L and 1089 x 10<sup>6</sup>/L. ND: Not done. NA: Not available.
